# Supplementary material
Source: Springer Nature journal article supplement (https://www.springermedizin.de/resource/supplementary/12936_2013_2883_MOESM6_ESM.pdf/9544476)
Supplement: MOESM6 [file 9544476]

**Additional file 6: Results of analysis of variance and backfitting model of parasite prevalence and parasite and gametocyte densities.**

**2010 data**

Table S6a. Analysis of variance – full model. Dependent variable: parasite prevalence in 2010. See Table S3a (Additional file 3) for coding of categorical variables.

| Source               | SS       | df | MS       | F       | P     |
|----------------------|----------|----|----------|---------|-------|
| CONSTANT             | 4529.190 | 1  | 4529.190 | 132.281 | 0.000 |
| SITE                 | 1110.998 | 2  | 555.499  | 16.224  | 0.000 |
| SEASON               | 14.692   | 1  | 14.692   | 0.429   | 0.516 |
| ICON                 | 121.887  | 1  | 121.887  | 3.560   | 0.065 |
| ITN                  | 16.920   | 1  | 16.920   | 0.494   | 0.485 |
| SITE*SEASON          | 79.317   | 2  | 39.658   | 1.158   | 0.323 |
| SITE*ICON            | 17.189   | 2  | 8.594    | 0.251   | 0.779 |
| SITE*ITN             | 43.038   | 2  | 21.519   | 0.628   | 0.538 |
| SEASON*ICON          | 40.514   | 1  | 40.514   | 1.183   | 0.282 |
| SEASON*ITN           | 262.342  | 1  | 262.342  | 7.662   | 0.008 |
| ICON*ITN             | 67.621   | 1  | 67.621   | 1.975   | 0.166 |
| SITE*SEASON*ICON     | 17.589   | 2  | 8.795    | 0.257   | 0.775 |
| SITE*SEASON*ITN      | 61.271   | 2  | 30.636   | 0.895   | 0.415 |
| SITE*ICON*ITN        | 56.923   | 2  | 28.462   | 0.831   | 0.442 |
| SEASON*ICON*ITN      | 53.045   | 1  | 53.045   | 1.549   | 0.219 |
| SITE*SEASON*ICON*ITN | 30.281   | 2  | 15.140   | 0.442   | 0.645 |
| Error                | 1643.477 | 48 | 34.239   |         |       |

Table S6b. Parameter estimates after backfitting selection at significance level of 0.05. Dependent variable: parasite prevalence (%) in 2010. See Table S3a (Additional file 3) for coding of categorical variables.

| Term                             | Estimate | Std Error | t Ratio | Prob> t |
|----------------------------------|----------|-----------|---------|---------|
| Intercept                        | 6.807    | 0.716     | 9.510   | <.0001  |
| Site (Mbale vs. Iguhu & Emutete) | -4.148   | 0.716     | 5.790   | <.0001  |
| Site (Iguhu vs. Emutete)         | -1.924   | 0.837     | 2.300   | 0.025   |
| Season (Post)                    | -0.306   | 0.675     | 0.450   | 0.652   |
| ITN (yes)                        | -1.381   | 0.671     | 2.060   | 0.044   |
| ICON (yes)                       | -0.383   | 0.674     | 0.570   | 0.572   |
| Season (post)*ICON (yes)         | -1.777   | 0.673     | 2.640   | 0.010   |

Table S6c. Parameter estimates after backfitting selection with mean parasitemia (parasites per microliter blood) as dependent variable ( $F_{5,127} = 2.22$ ,  $P = 0.056$ ). See Table S3a (Additional file 3) for coding of categorical variables.

| Term                                            | Estimate | Std    |         |         |
|-------------------------------------------------|----------|--------|---------|---------|
|                                                 |          | Error  | t Ratio | Prob> t |
| Intercept                                       | 233.401  | 73.143 | 3.190   | 0.002   |
| Site (Mbale & Iguhu vs. Emutete)                | 88.368   | 73.143 | 1.210   | 0.229   |
| Season (Prior)                                  | 7.907    | 66.556 | 0.120   | 0.906   |
| ITN (yes)                                       | -43.174  | 66.122 | 0.650   | 0.515   |
| Site (Mbale & Iguhu vs. Emutete)*Season (Prior) | 148.986  | 73.143 | 2.040   | 0.044   |
| Site (Mbale & Iguhu vs. Emutete)*ITN(yes)       | 146.722  | 72.090 | 2.040   | 0.044   |

Table S6d. Parameter estimates after backfitting selection with mean gametocytemia (gametocyte per microliter blood) as dependent variable. See Table S3a (Additional file 3) for coding of categorical variables.

No variable has been selected at significant level of 0.05.

## 2011 Data

Table S6e. Analysis of variance – full model. Dependent variable: parasite prevalence (%) in 2011. See Table S3a (Additional file 3) for coding of categorical variables.

| Source               | SS        | df  | MS        | F       | P     |
|----------------------|-----------|-----|-----------|---------|-------|
| CONSTANT             | 14605.775 | 1   | 14605.775 | 261.277 | 0.000 |
| SITE                 | 4765.532  | 2   | 2382.766  | 42.624  | 0.000 |
| SEASON               | 85.283    | 2   | 42.641    | 0.763   | 0.469 |
| ICON                 | 538.150   | 1   | 538.150   | 9.627   | 0.002 |
| ITN                  | 74.092    | 1   | 74.092    | 1.325   | 0.252 |
| SITE*SEASON          | 802.335   | 4   | 200.584   | 3.588   | 0.009 |
| SITE*ICON            | 10.957    | 2   | 5.479     | 0.098   | 0.907 |
| SITE*ITN             | 137.793   | 2   | 68.897    | 1.232   | 0.296 |
| SEASON*ICON          | 202.328   | 2   | 101.164   | 1.810   | 0.169 |
| SEASON*ITN           | 67.840    | 2   | 33.920    | 0.607   | 0.547 |
| ICON*ITN             | 32.278    | 1   | 32.278    | 0.577   | 0.449 |
| SITE*SEASON*ICON     | 471.341   | 4   | 117.835   | 2.108   | 0.085 |
| SITE*SEASON*ITN      | 532.854   | 4   | 133.213   | 2.383   | 0.056 |
| SITE*ICON*ITN        | 167.457   | 2   | 83.729    | 1.498   | 0.228 |
| SEASON*ICON*ITN      | 354.767   | 2   | 177.383   | 3.173   | 0.046 |
| SITE*SEASON*ICON*ITN | 451.246   | 4   | 112.811   | 2.018   | 0.097 |
| Error                | 5869.664  | 105 | 55.902    |         |       |

Table S6f. Parameter estimates after backfitting selection at significance level of 0.05. Dependent variable: parasite prevalence (%) in 2011. See Table S3a (Additional file 3) for coding of categorical variables.

| Term                                | Estimate | Std   |         | Prob> t |
|-------------------------------------|----------|-------|---------|---------|
|                                     |          | Error | t Ratio |         |
| Intercept                           | 12.197   | 0.731 | 16.680  | <.0001  |
| Site (Iguhu & Emutete vs. Emakhaha) | 6.072    | 0.731 | 8.300   | <.0001  |
| Site (Iguhu vs. Emutete)            | 1.491    | 0.826 | 1.810   | 0.073   |
| ICON (yes)                          | -1.940   | 0.682 | 2.850   | 0.005   |

Table S6g. Parameter estimates after backfitting selection with mean parasitemia (parasites per microliter blood) as dependent variable ( $F_{12,143} = 2.47$ ,  $P = 0.006$ ). See Table S3a (Additional file 3) for coding of categorical variables.

| Term                                                                | Estimate | Std    |         | t Ratio | Prob> t |
|---------------------------------------------------------------------|----------|--------|---------|---------|---------|
|                                                                     |          | Error  | t Ratio |         |         |
| Intercept                                                           | 242.628  | 37.689 | 6.440   | <.0001  |         |
| Site (Emakhaha & Emutete vs. Iguhu)                                 | 61.393   | 33.974 | 1.810   | 0.073   |         |
| Season (Prior & Late vs. Post)                                      | 65.846   | 36.999 | 1.780   | 0.077   |         |
| ICON (yes)                                                          | -7.921   | 33.339 | 0.240   | 0.813   |         |
| ITN (yes)                                                           | -29.954  | 33.345 | 0.900   | 0.371   |         |
| Site (Emakhaha & Emutete vs. Iguhu)* Season (Prior & Late vs. Post) | 92.439   | 38.064 | 2.430   | 0.016   |         |
| Site (Emakhaha & Emutete vs. Iguhu)*ICON (yes)                      | 39.908   | 33.956 | 1.180   | 0.242   |         |
| Site (Emakhaha & Emutete vs. Iguhu)*ITN(yes)                        | -31.231  | 33.959 | 0.920   | 0.359   |         |
| Season (March & July vs. May)*ICON (yes)                            | 24.798   | 36.923 | 0.670   | 0.503   |         |
| Season (March & July vs. May)*ITN (yes)                             | -4.813   | 36.944 | 0.130   | 0.897   |         |
| ICON (yes)*ITN (yes)                                                | 14.371   | 33.339 | 0.430   | 0.667   |         |
| Season (Prior & Late vs. Post)*ICON (yes)*ITN (yes)                 | -98.220  | 36.923 | 2.660   | 0.009   |         |
| Site (Emakhaha & Emutete vs. Iguhu)*ICON (yes)*ITN (yes)            | -101.015 | 33.956 | 2.970   | 0.003   |         |

Table S6h. Parameter estimates after backfitting selection with mean gametocytemia (gametocyte per microliter blood) as dependent variable ( $F_{1,154} = 4.80$ ,  $P = 0.029$ ). See Table S3a (Additional file 3) for coding of categorical variables.

| Term       | Estimate | Std   |         | t Ratio | Prob> t |
|------------|----------|-------|---------|---------|---------|
|            |          | Error | t Ratio |         |         |
| Intercept  | 2.171    | 0.460 | 4.71    | <.0001  |         |
| ICON (yes) | -1.009   | 0.460 | 2.19    | 0.029   |         |
